# Supplementary material
Source: publisher site journal article supplement (https://www.dovepress.com/get_supplementary_file.php?f=409028.docx)
Supplement: Supplementary file 1 [file get_supplementary_file.php]

**Supplementary files**

**Supplementary file. Table 1:** Between groups pairwise comparisons.

|  | **Baseline** | | | **MPT** | | | **SMPT** | | |
| --- | --- | --- | --- | --- | --- | --- | --- | --- | --- |
|  | **Difference (95%CI)** | **ap value** | **r (95%CI)** | **Difference (95%CI)** | **ap value** | **r (95%CI)** | **Difference (95%CI)** | **ap value** | **r (95%CI)** |
| Gluteus medius RMS mean (µV) | -1.166 (-5.958, 3.627) | >0.999 | -0.015 (-0.229, 0.175) | 0.647 (-4.309, 5.603) | >0.999 | 0.051 (-0.149, 0.342) | 0.246 (-4.619, 5.111) | >0.999 | 0.063 (-0.265, 0.343) |
| Gluteus medius RMS mean/sec (µV/sec) | -0.013 (-0.065, 0.04) | >0.999 | -0.04 (-0.295, 0.209) | 0.016 (-0.04, 0.071) | >0.999 | 0.056 (-0.212, 0.299) | 0.006 (-0.045, 0.056) | >0.999 | 0.039 (-0.157, 0.294) |
| Gluteus medius MVC mean (µV) | -2.886 (-28.225, 22.453) | >0.999 | 0.044 (-0.183, 0.274) | 3.865 (-22.446, 30.176) | >0.999 | 0.049 (-0.147, 0.236) | 1.891 (-23.995, 27.777) | >0.999 | 0.096 (-0.132, 0.309) |
| Tensor fasciae latae RMS mean (µV) | -0.394 (-7.143, 6.355) | >0.999 | 0.051 (-0.179, 0.238) | 1.056 (-7.038, 9.15) | >0.999 | 0.047 (-0.191, 0.304) | 1.495 (-7.911, 10.902) | >0.999 | 0.072 (-0.117, 0.31) |
| Tensor fasciae latae RMS mean/sec (µV/sec) | -0.012 (-0.09, 0.065) | >0.999 | 0.048 (-0.158, 0.314) | 0.018 (-0.076, 0.112) | >0.999 | 0.07 (-0.173, 0.323) | 0.02 (-0.105, 0.145) | >0.999 | 0.083 (-0.154, 0.33) |
| Tensor fasciae latae MVC mean (µV) | 9.235 (-35.668, 54.138) | >0.999 | 0.06 (-0.171, 0.219) | -2.558 (-48.117, 43.001) | >0.999 | 0.017 (-0.151, 0.309) | 8.577 (-33.66, 50.814) | >0.999 | 0.091 (-0.149, 0.319) |
| Dynamometry peak force | 0.36 (-0.516, 1.236) | >0.999 | 0.01 (-0.193, 0.256) | 0.437 (-0.491, 1.365) | >0.999 | 0.024 (-0.235, 0.3) | 0.123 (-0.745, 0.991) | >0.999 | 0 (-0.229, 0.211) |
| Dynamometry average force | 0.125 (-0.215, 0.465) | >0.999 | 0.04 (-0.137, 0.206) | 0.225 (0.008, 0.442) | 0.738 | 0.112 (-0.067, 0.314) | -0.062 (-0.309, 0.185) | >0.999 | -0.062 (-0.247, 0.129) |
| Dynamometry peak time | 0.273 (-0.497, 1.043) | >0.999 | 0.009 (-0.23, 0.213) | 0.27 (-0.575, 1.115) | >0.999 | 0.017 (-0.18, 0.248) | 0.052 (-0.728, 0.833) | >0.999 | -0.009 (-0.274, 0.19) |

95%CI: 95% confidence interval. r: non parametric effect size. asignificant if p<0.05. MPT, magnetic particle tape; SMPT, sham magnetic particle tape.

**Supplementary file. Table 2:** Within groups pairwise comparisons.

|  | | **Dominant leg** | | | **Non dominant leg** | | |
| --- | --- | --- | --- | --- | --- | --- | --- |
|  |  | **Difference (95%CI)** | **ap value** | **r (95%CI)** | **Difference (95%CI)** | **ap value** | **r (95%CI)** |
| Gluteus medius RMS mean (µV) | Experimental tape - Baseline | 1 (1, 1) | <0.001 | -0.586 (-0.788, -0.303) | 1 (0.464, 1) | 0.127 | -0.586 (-0.788, -0.303) |
|  | Control tape - Baseline | 1 (-0.212, 1) | 0.148 | -0.306 (-0.606, 0.006) | 0.286 (-3.258, 1) | >0.999 | -0.306 (-0.606, 0.006) |
|  | Control tape - Experimental tape | -5.728 (-9.25, -2.206) | 0.006 | 0.475 (0.218, 0.709) | -4.526 (-7.804, -1.247) | 0.009 | 0.475 (0.218, 0.709) |
| Gluteus medius RMS mean/sec (µV/sec) | Experimental tape - Baseline | 0.126 (0.038, 0.214) | 0.004 | -0.479 (-0.733, -0.208) | 0.04 (-0.027, 0.108) | >0.999 | -0.479 (-0.733, -0.208) |
|  | Control tape - Baseline | 0.048 (-0.023, 0.118) | 0.39 | -0.219 (-0.477, 0.086) | -0.007 (-0.056, 0.042) | >0.999 | -0.219 (-0.477, 0.086) |
|  | Control tape - Experimental tape | -0.078 (-0.133, -0.024) | 0.011 | 0.448 (0.164, 0.625) | -0.048 (-0.092, -0.003) | 0.149 | 0.448 (0.164, 0.625) |
| Gluteus medius MVC mean (µV) | Experimental tape - Baseline | 1 (1, 1) | 0.007 | -0.467 (-0.668, -0.113) | 1 (-1.2, 1) | 0.136 | -0.467 (-0.668, -0.113) |
|  | Control tape - Baseline | 1 (0.706, 1) | 0.301 | -0.258 (-0.502, 0.026) | 1 (-21.847, 1) | >0.999 | -0.258 (-0.502, 0.026) |
|  | Control tape - Experimental tape | -24.975 (-51.402, 1) | 0.246 | 0.272 (-0.035, 0.588) | -19.053 (-35.015, -3.091) | 0.021 | 0.272 (-0.035, 0.588) |
| Tensor fasciae latae RMS mean (µV) | Experimental tape - Baseline | 1 (0.138, 1) | 0.002 | -0.512 (-0.731, -0.178) | 1 (1, 1) | 0.005 | -0.512 (-0.731, -0.178) |
|  | Control tape - Baseline | 1 (-12.038, 1) | >0.999 | 0.031 (-0.292, 0.344) | -0.042 (-5.376, 1) | >0.999 | 0.031 (-0.292, 0.344) |
|  | Control tape - Experimental tape | -7.863 (-14.743, -0.983) | <0.001 | 0.631 (0.389, 0.808) | -9.181 (-15.611, -2.752) | 0.007 | 0.631 (0.389, 0.808) |
| Tensor fasciae latae RMS mean/sec (µV/sec) | Experimental tape - Baseline | 0.17 (-0.042, 0.383) | 0.005 | -0.464 (-0.703, -0.201) | 0.079 (-0.017, 0.175) | 0.123 | -0.464 (-0.703, -0.201) |
|  | Control tape - Baseline | 0.097 (-0.205, 0.399) | >0.999 | 0.051 (-0.273, 0.407) | -0.001 (-0.069, 0.067) | >0.999 | 0.051 (-0.273, 0.407) |
|  | Control tape - Experimental tape | -0.074 (-0.191, 0.043) | 0.001 | 0.528 (0.239, 0.756) | -0.08 (-0.153, -0.006) | 0.02 | 0.528 (0.239, 0.756) |
| Tensor fasciae latae MVC mean (µV) | Experimental tape - Baseline | 1 (-6.319, 1) | 0.164 | -0.3 (-0.568, -0.004) | 1 (1, 1) | <0.001 | -0.3 (-0.568, -0.004) |
|  | Control tape - Baseline | -10.027 (-52.746, 1) | >0.999 | 0.108 (-0.198, 0.423) | -8.052 (-31.859, 1) | 0.985 | 0.108 (-0.198, 0.423) |
|  | Control tape - Experimental tape | -37.727 (-67.515, -7.938) | <0.001 | 0.603 (0.391, 0.764) | -71.131 (-110.174, -32.089) | <0.001 | 0.603 (0.391, 0.764) |
| Dynamometry peak force | Experimental tape - Baseline | 1 (1, 1) | <0.001 | -0.72 (-0.829, -0.584) | 1 (1, 1) | <0.001 | -0.72 (-0.829, -0.584) |
|  | Control tape - Baseline | -1.321 (-3.874, 1) | 0.98 | 0.155 (-0.155, 0.436) | -0.611 (-3.525, 1) | >0.999 | 0.155 (-0.155, 0.436) |
|  | Control tape - Experimental tape | -8.757 (-11.858, -5.656) | <0.001 | 0.748 (0.593, 0.855) | -7.815 (-11.676, -3.954) | <0.001 | 0.748 (0.593, 0.855) |
| Dynamometry average force | Experimental tape - Baseline | 0.452 (-0.461, 1) | 0.961 | -0.154 (-0.472, 0.189) | 0.152 (-0.518, 0.821) | >0.999 | -0.154 (-0.472, 0.189) |
|  | Control tape - Baseline | -0.395 (-1.295, 0.505) | 0.843 | 0.164 (-0.199, 0.516) | 0.166 (-0.5, 0.833) | >0.999 | 0.164 (-0.199, 0.516) |
|  | Control tape - Experimental tape | -0.847 (-1.58, -0.114) | 0.06 | 0.361 (0.097, 0.605) | 0.015 (-0.627, 0.657) | >0.999 | 0.361 (0.097, 0.605) |
| Dynamometry peak time | Experimental tape - Baseline | 1 (1, 1) | <0.001 | -0.693 (-0.805, -0.512) | 1 (1, 1) | <0.001 | -0.693 (-0.805, -0.512) |
|  | Control tape - Baseline | -1.023 (-3.551, 1) | >0.999 | 0.075 (-0.218, 0.381) | -0.36 (-3.081, 1) | >0.999 | 0.075 (-0.218, 0.381) |
|  | Control tape - Experimental tape | -8.153 (-10.985, -5.321) | <0.001 | 0.768 (0.591, 0.862) | -7.5 (-10.969, -4.031) | <0.001 | 0.768 (0.591, 0.862) |

95%CI: 95% confidence interval. r: non parametric effect size. asignificant if p<0.05 (shown in red). RMS, root mean square; MVC, maximal voluntary contraction

**Supplementary file. Table 3:** sEMG raw smoothed models between dominant-non dominant leg.

|  | **EDF (dfref)** | **F** | **ap value** |
| --- | --- | --- | --- |
| Gluteus medius baseline | 3.565 (3.826) | 1.048 | 0.864 |
| Gluteus medius MPT | 3 (3) | 0.957 | 0.812 |
| Gluteus medius SMPT | 3 (3) | 5.941 | 0.115 |
| Tensor fasciae latae baseline | 3 (3) | 4.717 | 0.194 |
| Tensor fasciae latae MPT | 2.431 (2.537) | 3.727 | 0.22 |
| Tensor fasciae latae SMPT | 1.431 (1.537) | 3.589 | 0.1 |

EDF: Effective degrees of freedom. dfref: Reference degrees of freedom. asignificant if p<0.05. MPT, magnetic particle tape; SMPT, sham magnetic particle tape.
